# Supplementary material for: Template-assisted 2D self-assembled chiral Kagomé network for selective adsorption of coronene
Source: Royal Society of Chemistry journal article supplement (doi:10.1039/d0cc05937d), 2020-01-01
Supplement: d0cc05937d1.pdf [file d0cc05937d1.pdf]

# Supplementary Information

## Template-assisted 2D self-assembled chiral Kagomé network for selective adsorption of coronene

Yi Wang<sup>a, ‡</sup>, Xiaoping Tan,<sup>b, ‡</sup> Peng Pang<sup>a</sup>, Bang Li<sup>a</sup>, Xinrui Miao<sup>a,\*</sup>, Xiaohong Cheng<sup>b,\*</sup> and Wenli Deng<sup>a,\*</sup>

<sup>a</sup>College of Materials Science and Engineering, South China University of Technology, Guangzhou 510640, People's Republic of China.

<sup>b</sup>Key Laboratory of Medicinal Chemistry for Natural Resources, Chemistry School of Chemical Science and Technology, Yunnan University, Kunming 650091, People's Republic of China.

<sup>‡</sup>The authors contributed to this work equally.

\*To whom correspondence should be addressed. E-mail: msxrmiao@scut.edu.cn; xhcheng@ynu.edu.cn, and wldeng@scut.edu.cn

### 1. S1. Experimental section

#### S1.1 Sample preparation

2TDT-10 (6-(5'-(4-((3,4,5-tris (decyloxy)benzyl)oxy)phenyl)-[2,2'-bithiophen]-5-yl)-1,3,5-triazine-2,4-diamine) was home synthesized and reported in previous work.<sup>1</sup> COR, 1-octanoic acid, 1-phenyloctane, *n*-tridecane and *n*-tetradecane were purchased from TCI. All these materials were used without further purification. 1-octanoic acid, 1-phenyloctane, *n*-tridecane and *n*-tetradecane functioned as solvent to dissolve 2TDT-10 and COR, and the initial concentrations of 2TDT-10 and COR were controlled around 10<sup>-4</sup> mol·L<sup>-1</sup>. The assemblies were prepared by subsequent deposition of the components onto a freshly cleaved HOPG (grade ZYB, Bruker, USA) surface. All experiments were performed at room temperature. 2TDT-10 solution was deposited on HOPG, and then detected by STM. Afterwards, COR dissolved in *n*-tridecane and *n*-tetradecane was added to 2TDT-10 self-assembly Kagomé structure followed by STM detection, respectively. The low concentration of COR solution was controlled below 10<sup>-6</sup> mol·L<sup>-1</sup>.

#### S1.2 STM detection

The STM measurements were performed on a Nanoscope IIIa (Bruker, USA). In this work, all the images were recorded using the constant current mode under ambient conditions. As STM probes, mechanically cut Pt/Ir tips (80/20) were used.

#### S1.3 DFT calculations

DFT calculations were performed using the Gaussian 09 software package. The full-geometry optimization of the molecule was conducted using the hybrid M06-2X method together with the split-valence polarized 6-31+g(d) basis set.

### References:

1. C. Liu, H. Gao, T. Li, Y. Xiao and X. H. Cheng, *J. Mol. Struct.*, 2019, **1193**, 294-302.

## Additional STM Data

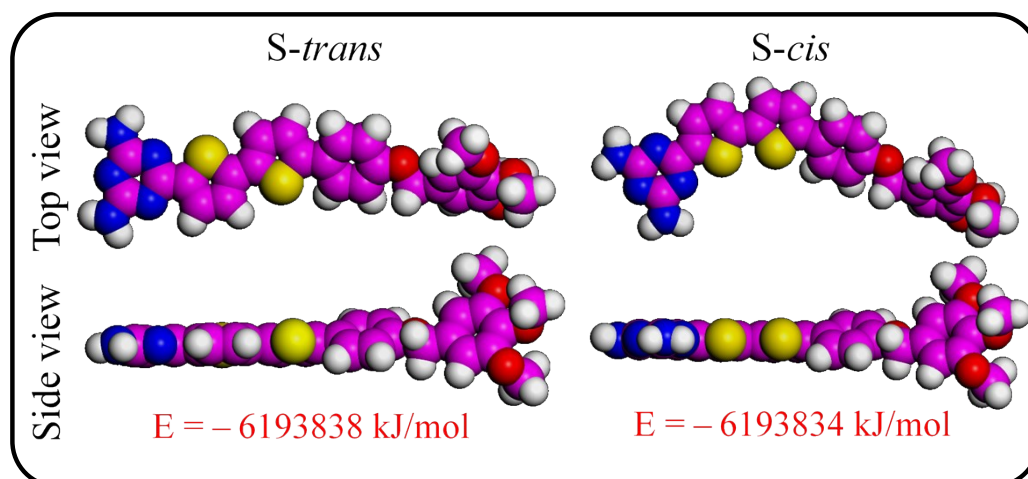

**Fig. S1** Scheme of the molecular conformation (the terminal  $C_{10}$  chains of 2TDT-10 are replaced by methyl) and corresponding energy. Left: straight *s-trans* conformation; Right: curved *s-cis* conformation. The top and side views of two molecular conformations are presented.

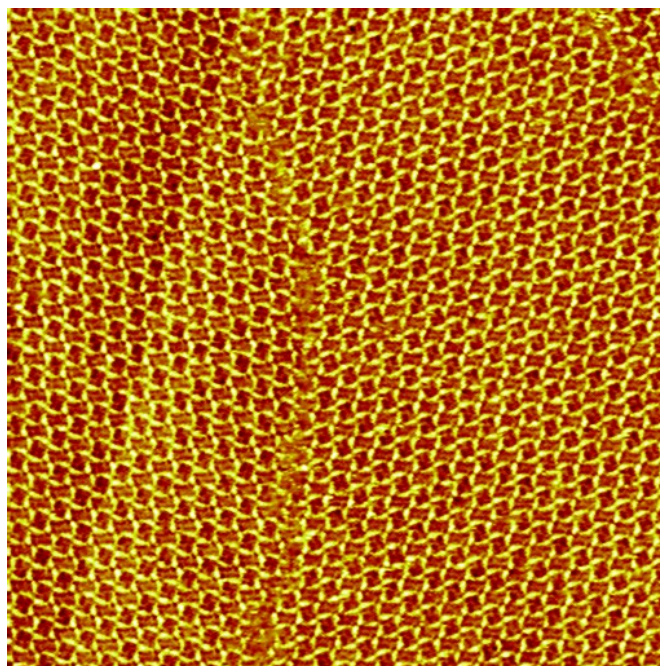

**Fig. S2** Large-scale STM image of 2TDT-10 adlayer showing the four-leaved I pattern at the 1-octanoic acid/HOPG interface ( $90 \times 90$  nm<sup>2</sup>;  $I_t = 430$  pA, and  $V_b = 500$  mV. Concentration:  $1.5 \times 10^{-4}$  M).

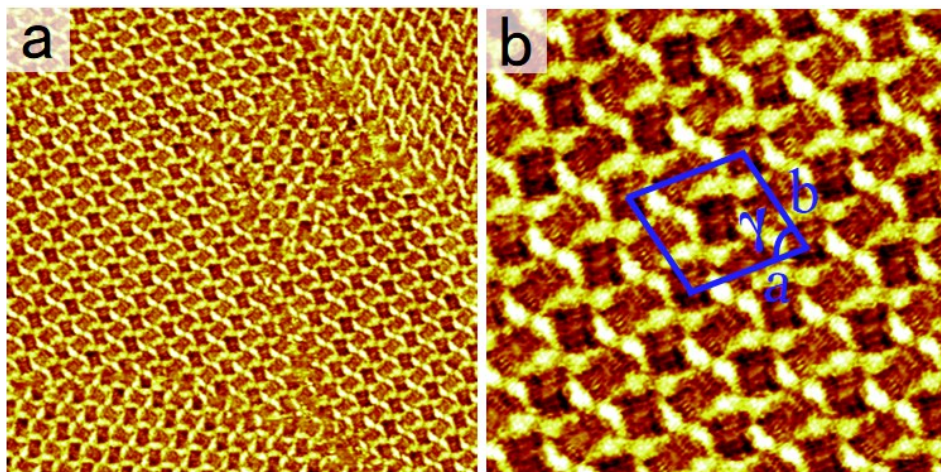

**Fig. S3** Large-scale (a) and high-resolution (b) STM images of the 2TDT-10 adlayer showing the four-leaved I pattern at the 1-phenyloctane/HOPG interface ( $80 \times 80 \text{ nm}^2$ ;  $I_t = 480 \text{ pA}$ , and  $V_b = 590 \text{ mV}$ ,  $24 \times 24 \text{ nm}^2$ ;  $I_t = 480 \text{ pA}$ , and  $V_b = 590 \text{ mV}$ . Concentration:  $1.5 \times 10^{-4} \text{ M}$ ).

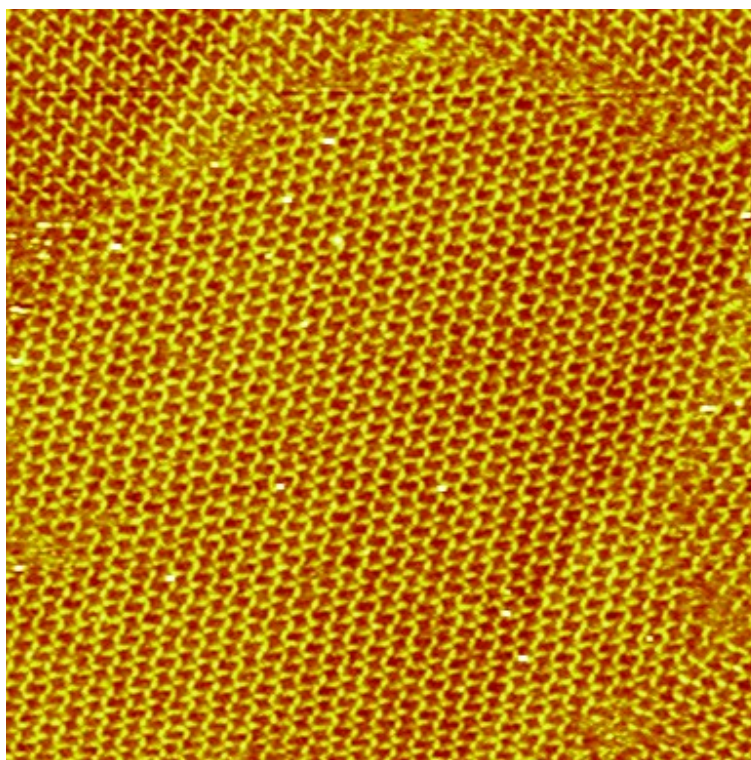

**Fig. S4** Large-scale STM image of 2TDT-10 self-assembled nanostructure showing the four-leaved I pattern at the *n*-tridecane/HOPG interface ( $110 \times 110 \text{ nm}^2$ ;  $1.0 \times 10^{-4} \text{ M}$ ;  $I_t = 480 \text{ pA}$ , and  $V_b = 590 \text{ mV}$ . Concentration:  $1.5 \times 10^{-4} \text{ M}$ ).

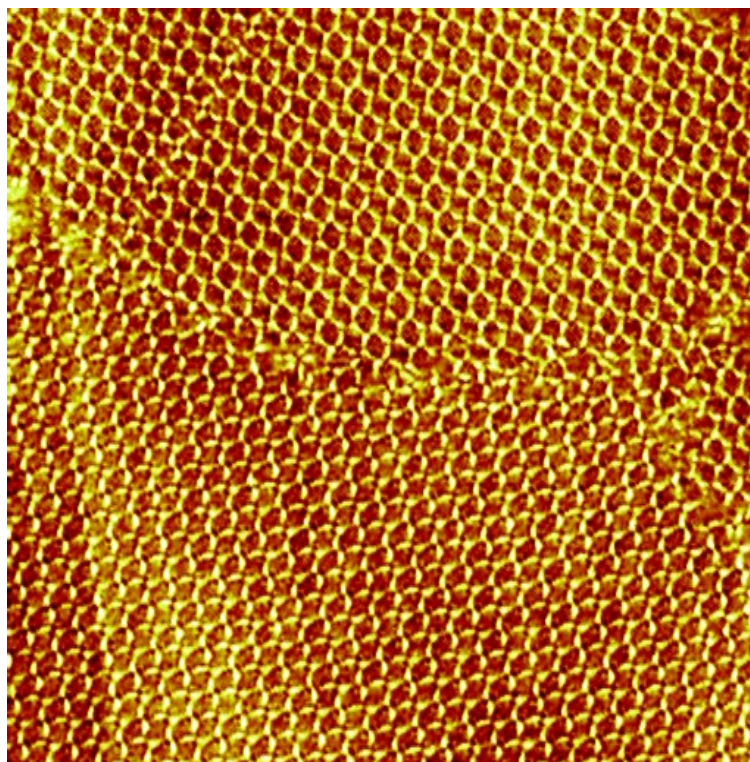

**Fig. S5** Large-scale STM image of 2TDT-10 self-assembled nanostructure showing the four-leaved II pattern at the *n*-tridecane/HOPG interface ( $105 \times 105 \text{ nm}^2$ ;  $I_t=480 \text{ pA}$ , and  $V_b = 590 \text{ mV}$ . Concentration:  $2.0 \times 10^{-5} \text{ M}$ ).

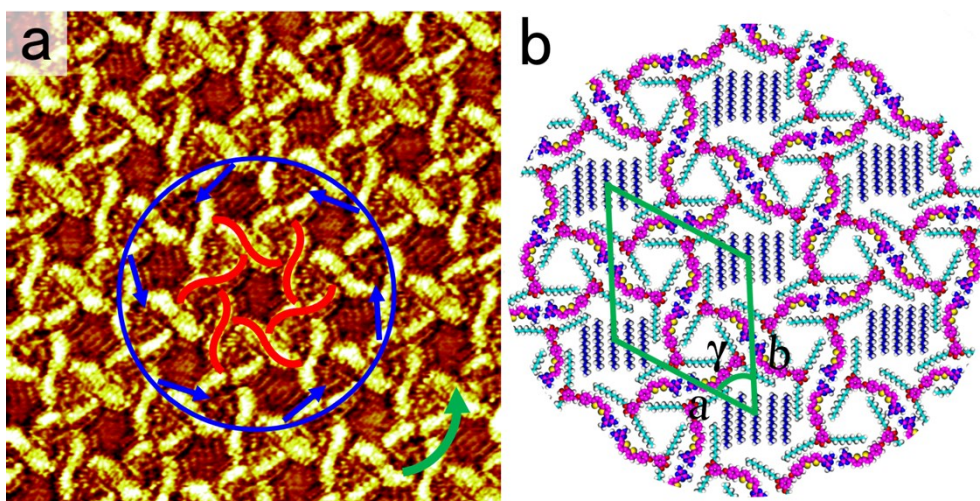

**Fig. S6** High-resolution STM image of 2TDT-10 adlayer at the *n*-tridecane/HOPG interface under low solution concentrations. (a) CCW Kagomé pattern: ( $30 \times 30 \text{ nm}^2$ ;  $I_t = 480 \text{ pA}$ , and  $V_b = 600 \text{ mV}$ ; Concentration:  $4.0 \times 10^{-6} \text{ M}$ ). (b) Tentative models of CCW Kagomé networks. A unit cell is indicated in green in the model.

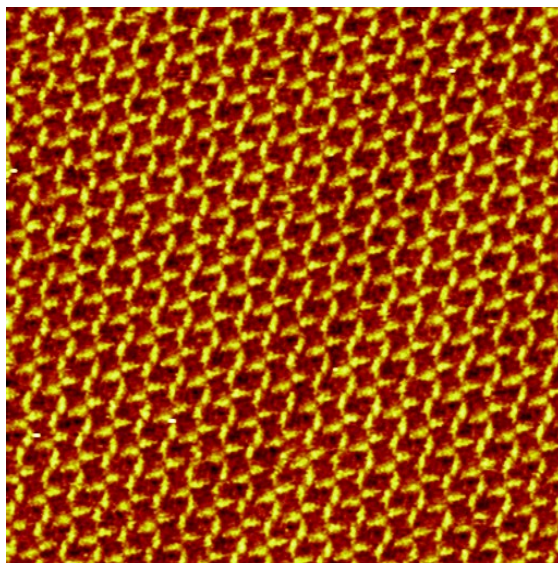

**Fig. S7** Large-scale STM image of 2TDT-10 self-assembled nanostructure showing the four-leaved I pattern at the *n*-tetradecane/HOPG interface ( $67 \times 67 \text{ nm}^2$ ;  $I_t = 490 \text{ pA}$ , and  $V_b = 580 \text{ mV}$ . Concentration:  $1.5 \times 10^{-4} \text{ M}$ ).

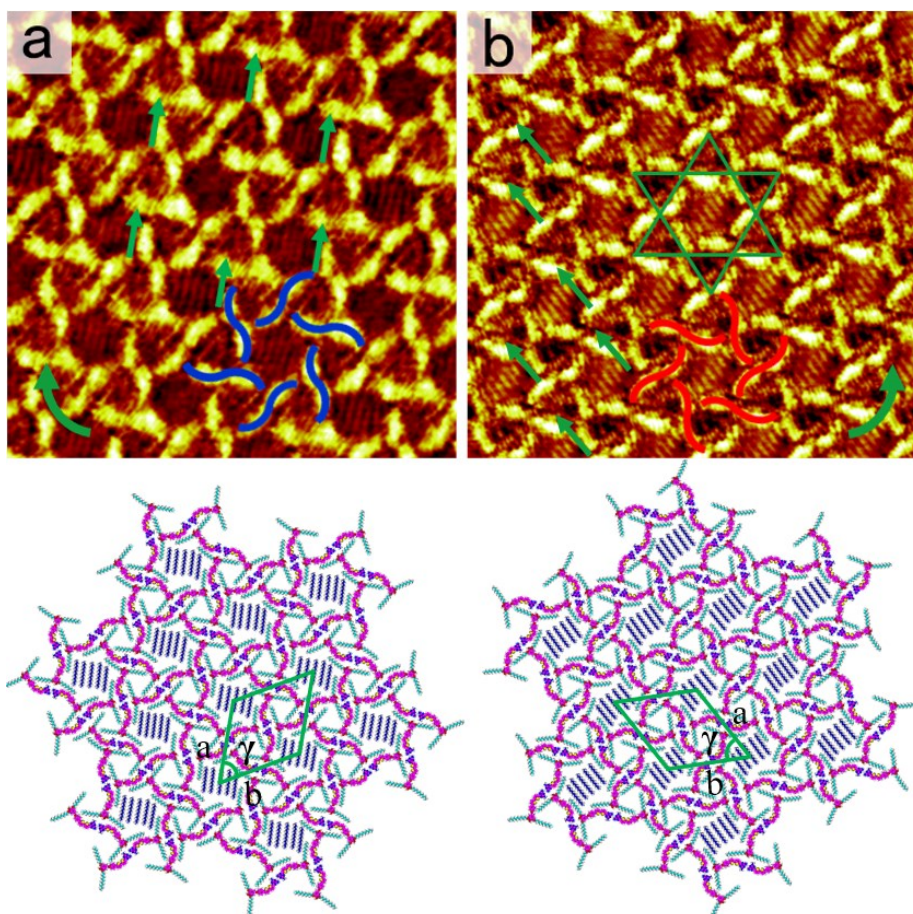

**Fig. S8** (a,b) High-resolution STM images of 2TDT-10 adlayers at the *n*-tetradecane/HOPG interface with a low solution concentration. (a) CW Kagomé pattern: ( $24 \times 24 \text{ nm}^2$ ;  $I_t = 480 \text{ pA}$ , and  $V_b = 600 \text{ mV}$ . Concentration:  $4.0 \times 10^{-6} \text{ M}$ ). Green straight arrows represent the direction of the co-adsorbed *n*-tetradecane. (b) CCW Kagomé pattern: ( $24 \times 24 \text{ nm}^2$ ;  $I_t = 485 \text{ pA}$ , and  $V_b = 610 \text{ mV}$ . Concentration:  $4.0 \times 10^{-6} \text{ M}$ ). (c,d) Tentative

models of monolayer structure with CW and CCW Kagomé networks, respectively. A unit cell is indicated in green for each model. Green straight arrows represent the direction of the co-adsorbed *n*-tetradecane in (a,b).

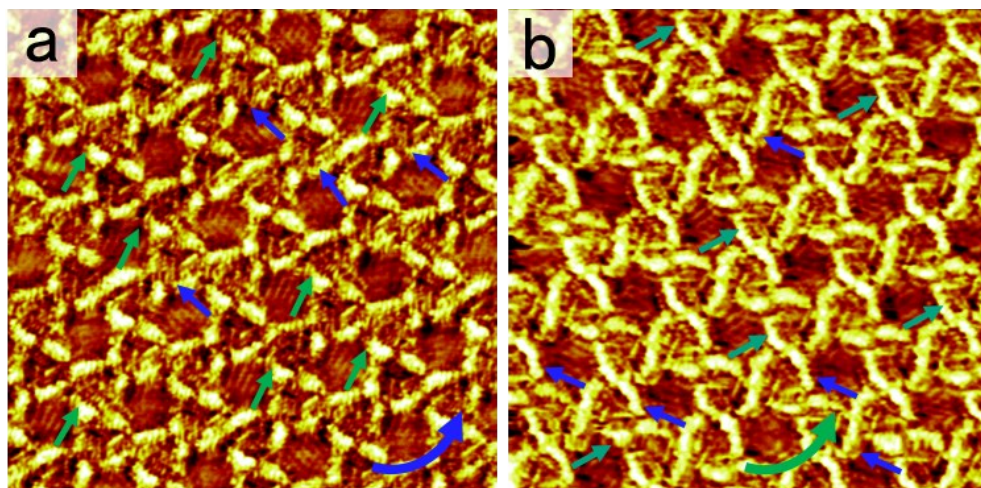

**Fig. S9** (a,b) High-resolution STM images of 2T-10 CCW kagomé structures at the *n*-tetradecane/HOPG interface ( $30 \times 30 \text{ nm}^2$ ;  $I_t=480 \text{ pA}$ , and  $V_b = 590 \text{ mV}$ ; Concentration:  $4.0 \times 10^{-6} \text{ M}$ .  $30 \times 30 \text{ nm}^2$ ;  $I_t=460 \text{ pA}$ , and  $V_b = 570 \text{ mV}$ ; Concentration:  $4.0 \times 10^{-6} \text{ M}$ ). Arrow show the different directions of the coadsorbed solvent orientation in the cavities.

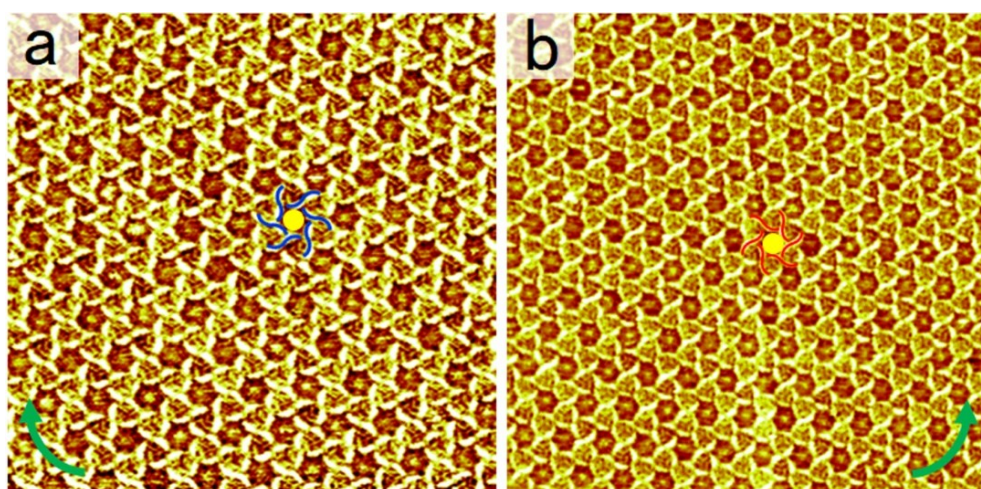

**Fig. S10** Large-scale STM images of (a) CW and (b) CCW 2TDT-10/COR (host-guest) Kagomé structures at the *n*-tridecane/HOPG interface. (a)  $60 \times 60 \text{ nm}^2$ ;  $I_t=480 \text{ pA}$ , and  $V_b = 590 \text{ mV}$ ; Concentration:  $2.0 \times 10^{-6} \text{ M}$ . (b)  $75 \times 75 \text{ nm}^2$ ;  $I_t = 460 \text{ pA}$ , and  $V_b = 575 \text{ mV}$ ; Concentration:  $2.0 \times 10^{-6} \text{ M}$ .

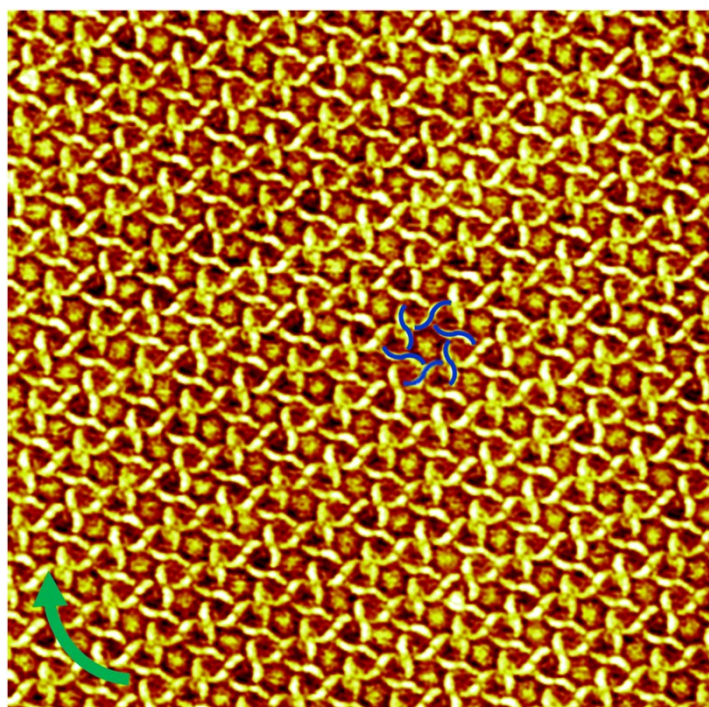

**Fig. S11** Large-scale STM image of CW 2TDT-10/COR (host-guest) Kagomé structures at the *n*-tetradecane/HOPG interface. (a)  $75 \times 75 \text{ nm}^2$ ;  $I_t = 480 \text{ pA}$  and  $V_b = 590 \text{ mV}$ . Concentration:  $2.0 \times 10^{-6} \text{ M}$ .

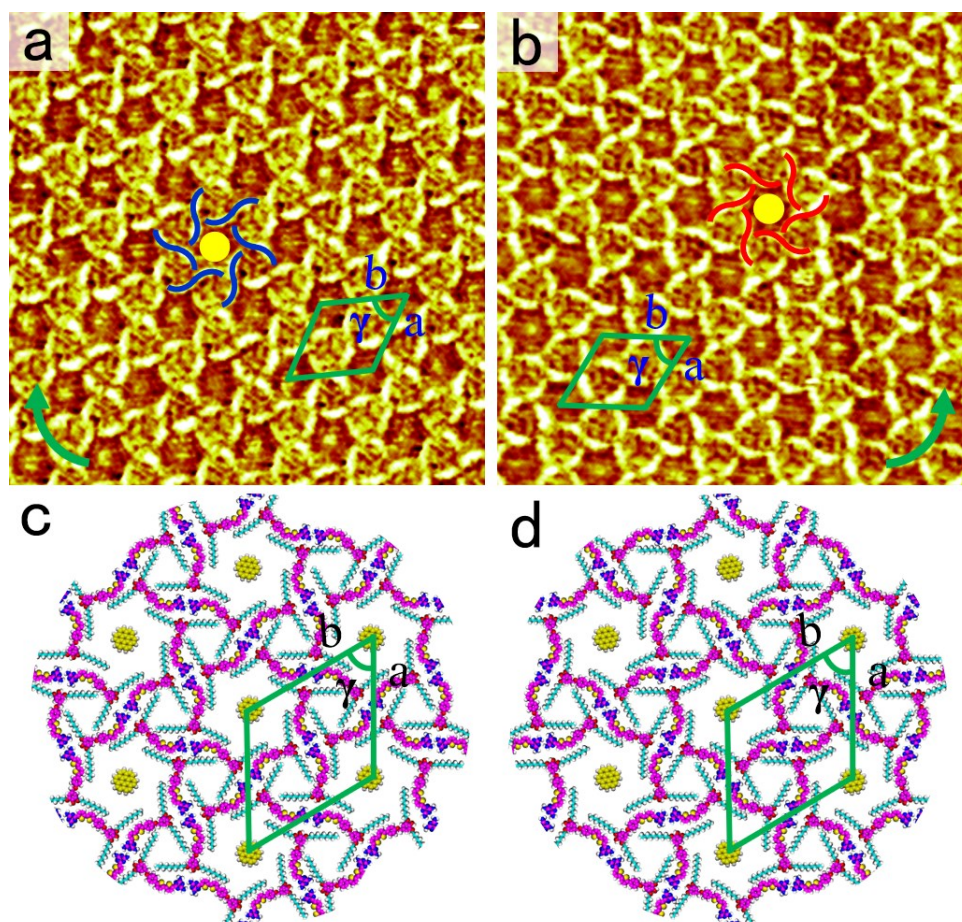

**Fig. S12** (a,b) High-resolution STM images showing CW and CCW Kagomé networks of 2TDT-10/COR nanostructures at the *n*-tridecane/HOPG interface. (a)  $30 \times 30 \text{ nm}^2$ ;  $I_t = 450 \text{ pA}$  and  $V_b = 590 \text{ mV}$ .

Concentration:  $2.0 \times 10^{-6}$  M. (b)  $30 \times 30$  nm<sup>2</sup>;  $I_t = 480$  pA and  $V_b = 570$  mV. Concentration:  $2.0 \times 10^{-6}$  M. (c,d) Tentative models for host-guest CW and CCW Kagomé networks. A unit cell is indicated in green for each model.

**Table S1. Lattice Parameters of Molecular Self-Assembled Patterns for 2TDT-10 under Different Solvents at the Interface.**

| Structural model    | Solvent               | $a$ (nm)      | $b$ (nm)      | $\theta$ (°) | N <sup>a</sup> | Area density, S (nm <sup>2</sup> per molecule) |
|---------------------|-----------------------|---------------|---------------|--------------|----------------|------------------------------------------------|
| Four-leaved I       | Octanoic acid         | $4.5 \pm 0.1$ | $6.2 \pm 0.1$ | $40 \pm 1$   | 4              | 4.59                                           |
|                     | 1-Phenyl octane       |               |               |              |                |                                                |
|                     | <i>n</i> -Tridecane   |               |               |              |                |                                                |
|                     | <i>n</i> -Tetradecane |               |               |              |                |                                                |
| Four-leaved II      | <i>n</i> -Tridecane   | $3.9 \pm 0.1$ | $6.2 \pm 0.1$ | $50 \pm 1$   | 4              | 4.73                                           |
| Kagomé network      | <i>n</i> -Tridecane   | $6.1 \pm 0.1$ | $6.1 \pm 0.1$ | $60 \pm 1$   | 6              | 5.37                                           |
|                     | <i>n</i> -Tetradecane |               |               |              |                |                                                |
| Kagomé (host-guest) | <i>n</i> -Tridecane   | $6.1 \pm 0.1$ | $6.1 \pm 0.1$ | $60 \pm 1$   | 6 (host)       | -                                              |
|                     | <i>n</i> -Tetradecane |               |               |              | 1 (guest)      |                                                |

<sup>a</sup>N stands for the number of molecules per unit cell in each structure.
